# Supplementary material
Source: HighWire-hosted journal article supplement (https://www.annfammed.org/highwire/filestream/27025/field_highwire_adjunct_files/0/IE_VA.pdf)
Supplement: IE_VA.pdf [file IE_VA.pdf]

# Enablers and Barriers to Deprescribing in Older Adults

This qualitative study explored the perspectives of older adults taking  $\geq 5$  medications regarding proactive dprescribing.

Patients’ attitudes toward deprescribing varied according to:

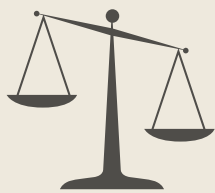

**Medication valuation**  
negative vs positive

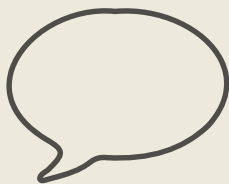

**Decision making**  
passive vs proactive

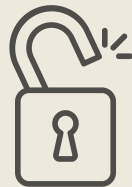

**Openness**  
cautious vs open

## 5 Distinct Patient Types

|                                                                                    |             |                         |           |                     |           |
|------------------------------------------------------------------------------------|-------------|-------------------------|-----------|---------------------|-----------|
| 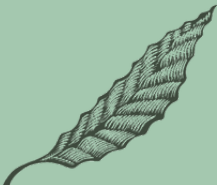 | Indifferent | Satisfied & risk-averse | Compliant | Fearful but passive | Proactive |
| Medication valuation                                                               | Indifferent | Positive                | Positive  | Negative            | Negative  |
| Decision making preference                                                         |             |                         |           | Passive             | Proactive |
| Openness to deprescribing                                                          |             | Cautious                | Open      |                     |           |

*Source:* [Ie K, Machino R, Albert SM, et al. Proactive deprescribing among older adults with polypharmacy: barriers and enablers. \*Ann Fam Med\*. 2025;23:10.1370/afm.240363](#)
